# Supplementary material for: Aldolase activity of serum albumins
Source: Royal Society of Chemistry journal article supplement (doi:10.1039/c0ob01219j), 2011-01-01
Supplement: c0ob01219j.pdf [file c0ob01219j.pdf]

### Aldolase Activity of Serum Albumins

Fabio Benedetti, Federico Berti\* and Silvia Bidoggia

#### Electronic Supplementary Informations

#### Table of Contents

1. General experimental protocol
2. HPLC data
3. Kinetic data
4. Stereoselectivity
5. Hammett plot
6. Production and purification of the MBP-IIa-103 peptide construct
7. Transition state geometries

#### 1. General experimental protocol

HSA and BSA were from Sigma-Aldrich, codes A1653 and A3912, respectively. Reference aldol products were obtained by the reaction of aldehydes with lithiated acetone, or by NaOH – Mg<sup>2+</sup> catalyzed reactions as described in: H.O. House, D.S. Crumrine, A.Y. Teranishi, H.D. Holmsted, *J. Am. Chem. Soc.* 1973, **95**, 3310–3324.

Both the albumin-catalyzed and the background reactions were run at 37.0 °C, in 10% acetone (1.36 M) in 100 mM phosphate buffer pH 7.5, 200 mM NaCl, and at substrate concentrations ranging from 0.50 to 2 mM. The catalyzed reactions were run in the presence of 200 μM albumin. Reaction rates were measured by HPLC following the appearance of the aldol product and the disappearance of aldehyde.

#### 2. HPLC data

HPLC analyses were carried out with a HP1100 series instrument equipped with a C18 Phenomenex Luna 5m 150 x 4.60 mm column using mixtures of acetonitrile and water as eluant, at 0.5 ml/min, with spectrophotometric detection at 214 nm. All the aldol reactions were followed by monitoring both the appearance of the aldol product and the disappearance of the aldehyde, according to the conditions reported in table S1. The appearance of dehydration products at high conversions was also monitored by HPLC.

| Aldehyde  | Eluant             |                            | rt Aldol | rt Aldehyde | rt Enone |
|-----------|--------------------|----------------------------|----------|-------------|----------|
|           | CH <sub>3</sub> CN | H <sub>2</sub> O(TFA 0.1%) | (min)    | (min)       | (min)    |
| <b>1a</b> | 40%                | 60%                        | 6.3      | 15.1        | 23.2     |
| <b>1b</b> | 35%                | 65%                        | 5.7      | 9.4         | 12.2     |
| <b>1c</b> | 45%                | 55%                        | 7.5      | 4.2         | 10.6     |
| <b>1d</b> | 20%                | 80%                        | 5.1      | 8.2         | 9.5      |
| <b>1e</b> | 30%                | 70%                        | 4.4      | 7.8         | 8.4      |

Table S1

#### 3. Kinetic data

0.2mM albumin in phosphate buffer (Na<sub>2</sub>HPO<sub>4</sub> 0.05M, NaCl 0.5M), pH 7.5 (890 μl) is incubated at 37°C for 15 min. 10 μl of an aldehyde solution in acetonitrile, and 100 μl of acetone are then added. The sample is sealed and kept at 37°C. Initial velocities are obtained by measuring the concentrations of aldehyde and aldol products during the first 5% reaction. All the measurements were quadruplicated, and the observed velocities are given in tables S2 – S6.

| [1a]<br>(mM) | V <sub>uncat</sub><br>(nM/s) | V <sub>HSA</sub><br>(nM/s) | V <sub>BSA</sub><br>(nM/s) | V <sub>BSA + warfarin (1,2 and 3 mM)</sub><br>(nM/s) |             |             |
|--------------|------------------------------|----------------------------|----------------------------|------------------------------------------------------|-------------|-------------|
| 0.50         | 0.141 ± 0.021                | 6.45 ± 0.12                | 3.62 ± 0.39                | 3.43 ± 0.04                                          | 2.58 ± 0.14 | 2.17 ± 0.09 |
| 0.75         | 0.242 ± 0.020                | 9.46 ± 0.17                | 5.12 ± 0.09                |                                                      |             |             |
| 1.00         | 0.310 ± 0.006                | 12.0 ± 2.1                 | 6.71 ± 0.11                | 6.02 ± 0.56                                          | 4.92 ± 0.73 | 3.96 ± 0.37 |
| 1.50         | 0.354 ± 0.004                | 14.4 ± 0.3                 | 9.15 ± 0.25                |                                                      |             |             |
| 1.75         | 0.438 ± 0.031                | 14.3 ± 0.2                 | 7.80 ± 0.90                |                                                      |             |             |
| 2.00         | 0.313 ± 0.045                | 17.0 ± 1.7                 | 8.46 ± 0.11                |                                                      |             |             |

Table S2

| [1b]<br>(mM) | V <sub>uncat</sub><br>(nM/s) | V <sub>BSA</sub><br>(nM/s) |
|--------------|------------------------------|----------------------------|
| 1.00         | 1.30 ± 0.09                  | 5.59 ± 0.96                |
| 1.50         | 1.43 ± 0.29                  | 7.26 ± 0.65                |
| 2.00         | 2.18 ± 0.32                  | 8.33 ± 0.29                |
| 3.00         | 3.02 ± 0.05                  | 13.7 ± 1.7                 |
| 5.00         | 3.36 ± 0.41                  | 15.3 ± 0.13                |
| 7.00         | 1.62 ± 0.21                  | 15.4 ± 2.8                 |

**Table S3**

| [1c]<br>(mM) | V <sub>uncat</sub><br>(nM/s) | V <sub>BSA</sub><br>(nM/s) |
|--------------|------------------------------|----------------------------|
| 0.64         | 3.11 ± 0.02                  | 14.9 ± 0.1                 |
| 1.06         | 4.94 ± 0.06                  | 34.7 ± 6.2                 |
| 1.16         | 5.38 ± 1.13                  | 25.1 ± 0.6                 |
| 1.91         | 8.60 ± 0.11                  | 43.6 ± 0.3                 |
| 1.93         | 8.69 ± 0.27                  | 37.3 ± 0.1                 |
| 2.67         | 11.8 ± 1.7                   | 53.9 ± 1.3                 |
| 3.60         | 15.9 ± 1.3                   | 62.6 ± 1.1                 |
| 4.59         | 20.1 ± 2.3                   | 68.1 ± 0.8                 |

**Table S4**

| [1d]<br>(mM) | V <sub>uncat</sub><br>(nM/s) | V <sub>BSA</sub><br>(nM/s) |
|--------------|------------------------------|----------------------------|
| 0.50         | 18.7 ± 4.3                   | 49.3 ± 2.2                 |
| 1.00         | 28.1 ± 1.7                   | 95.0 ± 3.9                 |
| 2.00         | 58.8 ± 3.4                   | 181.0 ± 9.3                |
| 2.50         | 72.2 ± 8.8                   | 202.3 ± 15.3               |
| 3.00         | 88.9 ± 5.5                   | 296.5 ± 18.2               |
| 4.00         | 110.0 ± 7.7                  | 273.1 ± 37.5               |

**Table S5**

| [1c]<br>(mM) | V <sub>uncat</sub><br>(nM/s) | V <sub>BSA</sub><br>(nM/s) |
|--------------|------------------------------|----------------------------|
| 0.50         | 8.14 ± 0.51                  | 25.8 ± 0.9                 |
| 1.00         | 17.8 ± 1.7                   | 56.9 ± 5.8                 |
| 1.50         | 29.2 ± 0.8                   | 95.7 ± 5.2                 |
| 2.00         | 60.8 ± 2.3                   | 127.3 ± 6.7                |
| 3.00         | 52.4 ± 0.9                   | 193.1 ± 4.9                |
| 4.00         | 119.2 ± 1.0                  | 239.8 ± 9.6                |
| 7.00         | 120.0 ± 9.8                  | 319.2 ± 8.9                |
| 10.0         | 162.6 ± 8.7                  | 325.0 ± 34.2               |

**Table S6**

#### 4. Stereoselectivity

Reference (S)-**2a** was obtained as follows: aldehyde **1a** (8 mg, 0.042 mmol) in 1 mL DMF and 2.2 mL acetone was slowly added to 40 mL of phosphate buffer pH 7.4 (Na<sub>2</sub>HPO<sub>4</sub> 0.05M e NaCl 0.5M). 10 mg of antibody 38C2, were then added and the reaction was kept at room temperature for seven days, under an inert atmosphere and in the dark. After this time the mixture was extracted with ethyl acetate. The organic layers were washed with aq. sodium metabisulfite and brine, and then dried over anhydrous NaSO<sub>4</sub>. The solvent was removed and the crude aldol was purified on silica.

Samples of **2a** from albumin-catalyzed reactions were obtained as follows: aldehyde **1a** (1.86 g, 10 mmol) was dissolved in 100 ml acetonitrile and added to 900 ml of a 200  $\mu$ M albumin solution in phosphate buffer. 100 ml of acetone were added and the mixture was kept at room temperature for seven days, under an inert atmosphere and in the dark. After this time the mixture was extracted with ethyl acetate. The organic layers were washed with aq. sodium metabisulfite and brine, and then dried over anhydrous  $\text{NaSO}_4$ . The solvent was removed and the crude aldol was purified on silica.

$\text{Eu}(\text{hfc})_3$  NMR experiments were performed in  $\text{CDCl}_3$  on a Varian 500 MHz spectrometer. The signals at 5.3 and 5.6 ppm, due to the hydroxymethine protons of aldol **2a**, after addition of 0.25 eq  $\text{Eu}(\text{hfc})_3$ , were used for measuring the ee: aldol **2a** was dissolved at known concentration in  $\text{CDCl}_3$ . A solution of [tri (Hepta-fluoro-propyl-Hydroxymethylene)-D-canforate]-europium-(III) ( $\text{Eu}(\text{hfc})_3$ ) in  $\text{CDCl}_3$  was then prepared at the same concentration. The NMR spectrum of pure aldol was recorded, and then 0.1 eq increments of  $\text{Eu}(\text{hfc})_3$  were added until the optimal resolution was achieved.

- Rac. **2a**:  $^1\text{H-NMR}$  500 MHz( $\text{CDCl}_3$ ) ( $\delta$ ): 0.87-1.25 (m,  $\text{C}=\text{OCH}_3^{A+B}$ ), 2.01-2.46(m, 2H,  $\text{CH}_2^{A+B}$ ), 3.66-3.99 (m, 6H,  $\text{OCH}_3^{A+B}$ ), **5.35 (s, 1H,  $\text{CH}^A\text{-OH}$ )**, **5.63 (s, 1H,  $\text{CH}^B\text{-OH}$ )**, 6.46-8.74 (m, 12H,  $\text{H-Ar}^{A+B}$ ).
- **S-2a** from the 38C2 – catalyzed aldol reaction:  $^1\text{H-NMR}$  500 MHz( $\text{CDCl}_3$ ) ( $\delta$ ): 0.85-1.26 (m,  $\text{C}=\text{OCH}_3^A$ ), 2.35 (m, 2H,  $\text{CH}_2^A$ ), 3.98 (m, 6H,  $\text{OCH}_3^A$ ), **5.31 (s, 1H,  $\text{CH}^A\text{-OH}$ )**, 6.56-8.35 (m, 12H,  $\text{H-Ar}^A$ ).
- **2a** from the BSA-catalyzed reaction:  $^1\text{H-NMR}$  500MHz( $\text{CDCl}_3$ ) ( $\delta$ ): 0.87-1.44 (m,  $\text{C}=\text{OCH}_3^{A+B}$ ), 2.22-2.58 (m,  $\text{CH}_2^{A+B}$ ), 3.82-3.97 (m,  $\text{OCH}_3^{A+B}$ ), **5.38 (s, 1H,  $\text{CH}^A\text{-OH}$ )**, **5.67 (s, 0.43H,  $\text{CH}^B\text{-OH}$ )**, 6.92-7.97 (m,  $\text{H-Ar}^{A+B}$ ).
- **2a** from the HSA-catalyzed reaction:  $^1\text{H-NMR}$  500MHz( $\text{CDCl}_3$ ) ( $\delta$ ): 0.87-1.44 (m,  $\text{C}=\text{OCH}_3^{A+B}$ ), 2.22-2.58 (m,  $\text{CH}_2^{A+B}$ ), 3.82-3.97 (m,  $\text{OCH}_3^{A+B}$ ), **5.32 (s, 0.20H,  $\text{CH}^A\text{-OH}$ )**, **5.61 (s, 1H,  $\text{CH}^B\text{-OH}$ )**, 6.92-7.97 (m,  $\text{H-Ar}^{A+B}$ ). HPLC: 7.3 min (27.7 %), 12.2 min (72.3 %).

## 5. Hammett plot

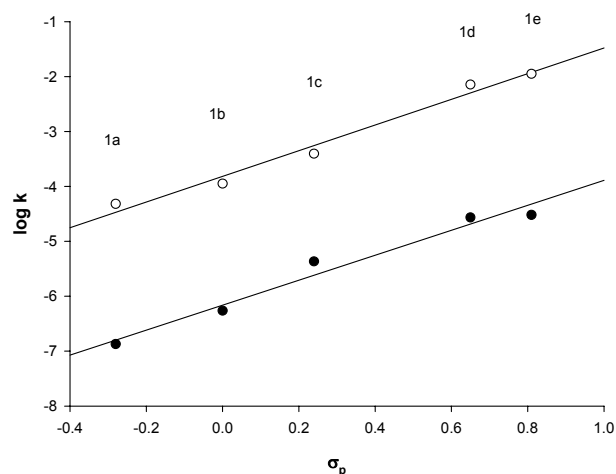

Hammett plot for the uncatalyzed ( $\bullet$ ) and BSA-catalyzed ( $\circ$ ) aldol reactions of aldehydes **1a-e** and acetone. The usual value of  $\sigma_p$  for the methoxy group is used for **2a**.

## 6. Production and purification of the MBP-Ila-103 peptide construct

A DNA strand encoding for the Ila-103 peptide was synthesized and the cloned sequence was expressed using the pMAL<sup>TM</sup> protein fusion and purification system to give the following resulting fusion protein (Ila-103 in red):

```
MKIKTGARILALSALTTMMFSASALAKIEEGKLVWINGDKGYNGLAEVGGKFEKDTGIK
VTVEHPDKLEEKFPQVAATGDGPDIIFWAHDRFGGYAQSGLLAEITPDKAFQDKLYPFT
WDAVRYNGKLIAYPIAVEALSIIYNKDLLPNNPKTWEEIPALDKELKAKGKSALMFLNQE
PYFTWPLIAADGGYAFKYENKDYDKVDNAGAKAGLTLFLVDLIKHKHMNADTDYSI
AEAAFNKGETAMTINGPWAWSNIDTSKVNYGVTVLPTFKGQPSKPFVGVLSAGINAASP
NKELAKEFLENYLLTDEGLEAVNKDKPLGAVALKSYEEELAKDPRIAATMENAQKGEIMP
NIPQMSAFWYAVRTAVINAASGRQTVDEALKDAQTNSSNNNNNNNNNNNLGDDDDKV
PEF
```

ASSAKQRLKCASLQKFGGERFKAWAVARLSQRFPKAEFAEVSKLVTDLTKVHTECCHGDI  
LECADDRADLAKYICENQDSISSKLKECCEKPLLEKSHCIAEVE

Theor. MW: 57195.9

0.5 µg of the pMAL vector DNA were digested in 20 µl of 1X NEBuffer 2 (Biolab) with 10 units of Xmn I and 10 units of Hind III at 37°C for 1 hour. The enzymes were then inactivated by incubating at 65°C for 10 minutes. 0.5 µg of the Ila-103 fragment DNA were similarly digested in 20 µl of 1X NEBuffer 2 with 10 units of Hind III, and then the enzyme was inactivated by incubating at 65°C for 10 minutes. After isolation of the two DNA strands, ligation was carried out by mixing 2 µl pMAL digest (40 ng) and 1 µl Ila-103 digest (20 ng) and heating the DNA mixture at 45°C for 5 minutes. 1 µl (~ 400 units) of T4 DNA Ligase were then added and the mixture was incubated at 16°C for 3 hours and heated at 65°C for 5 minutes. The ligation reaction products were then mixed with 25 µl competent NM522 strain, incubated on ice for 5 minutes and heated to 42°C for 2 minutes. After growing colonies at 37°C overnight, the cells were induced with 0.3 mM IPTG, and the presence of induced construct expression was checked. 1 liter culture broth was then inoculated with an overnight culture of cells and the culture was grown up to  $2 \times 10^8$  cells/ml. IPTG was added to a final concentration of 0.3 mM, and the cells were further incubated at 37°C for 2 hours. The cells were then harvested by centrifugation at 4000 x g for 20 minutes and resuspended in 50 ml of 20 mM Tris, 200 mM NaCl, 1mM EDTA, pH 7.4 (column buffer). The sample was frozen overnight at -20°C and thawed in cold water. The sample was then sonicated in pulses of 15 seconds and the release of proteins was monitored using the Bradford assay. The sample was then centrifuged at 9,000 x g for 30 minutes and the supernatant was diluted extract with. The protein extract was then affinity purified over an amylose resin column, and eluted with 10 mM maltose. The fusion protein containing fractions were finally dialyzed against PBS, and the purity was checked by sds:

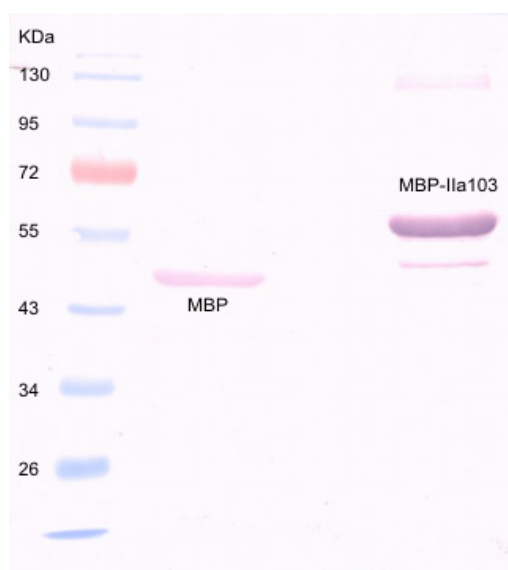

## 7. Transition state geometries

Transition state geometries for the aldol reaction of acetone enol (a) and of the acetone methylenamine (b) with benzaldehyde.

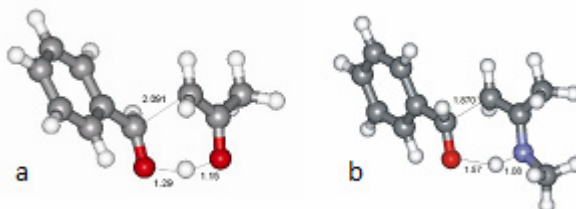

### Transition state coordinates

#### 1b + acetone

| Center Number | Atomic Number | Atomic Type | Coordinates (Angstroms) |           |           |
|---------------|---------------|-------------|-------------------------|-----------|-----------|
|               |               |             | X                       | Y         | Z         |
| 1             | 1             | 0           | -0.924989               | -0.269947 | -1.520105 |
| 2             | 8             | 0           | -3.037421               | -1.007791 | -0.132521 |
| 3             | 8             | 0           | -0.901163               | -1.490777 | 0.829561  |
| 4             | 6             | 0           | -2.707045               | 0.208121  | -0.442024 |
| 5             | 6             | 0           | -1.415113               | 0.479223  | -0.909588 |
| 6             | 1             | 0           | -1.129749               | 1.507434  | -1.110996 |
| 7             | 6             | 0           | -0.430054               | -0.292450 | 0.765038  |
| 8             | 1             | 0           | -2.083535               | -1.451284 | 0.323420  |
| 9             | 6             | 0           | -3.706749               | 1.281014  | -0.104736 |
| 10            | 1             | 0           | -3.976279               | 1.224719  | 0.956592  |
| 11            | 1             | 0           | -3.335720               | 2.281378  | -0.340721 |
| 12            | 1             | 0           | -4.626842               | 1.104475  | -0.674654 |
| 13            | 1             | 0           | -0.797268               | 0.457233  | 1.485843  |
| 14            | 6             | 0           | 0.989246                | -0.078107 | 0.358679  |
| 15            | 6             | 0           | 1.717256                | -1.117180 | -0.236435 |
| 16            | 6             | 0           | 1.615154                | 1.152248  | 0.598942  |
| 17            | 6             | 0           | 3.049181                | -0.921319 | -0.594797 |
| 18            | 1             | 0           | 1.225710                | -2.071954 | -0.393902 |
| 19            | 6             | 0           | 2.947738                | 1.347315  | 0.239792  |
| 20            | 1             | 0           | 1.054357                | 1.956568  | 1.071244  |
| 21            | 6             | 0           | 3.666885                | 0.310743  | -0.360522 |
| 22            | 1             | 0           | 3.610678                | -1.731931 | -1.051804 |
| 23            | 1             | 0           | 3.426562                | 2.303901  | 0.431243  |
| 24            | 1             | 0           | 4.706756                | 0.460304  | -0.638570 |

#### 1c + acetone

| Center Number | Atomic Number | Atomic Type | Coordinates (Angstroms) |           |           |
|---------------|---------------|-------------|-------------------------|-----------|-----------|
|               |               |             | X                       | Y         | Z         |
| 1             | 1             | 0           | 1.666490                | 0.173665  | -1.512044 |
| 2             | 8             | 0           | 3.901851                | 0.889810  | -0.320273 |
| 3             | 8             | 0           | 1.856113                | 1.539134  | 0.747038  |
| 4             | 6             | 0           | 3.493851                | -0.324978 | -0.526197 |
| 5             | 6             | 0           | 2.157082                | -0.556223 | -0.878612 |
| 6             | 1             | 0           | 1.813882                | -1.580004 | -0.995462 |
| 7             | 6             | 0           | 1.331407                | 0.362784  | 0.786508  |
| 8             | 1             | 0           | 3.014286                | 1.411118  | 0.152150  |
| 9             | 6             | 0           | 4.468524                | -1.422098 | -0.198998 |
| 10            | 1             | 0           | 4.827315                | -1.312761 | 0.831256  |
| 11            | 1             | 0           | 4.034848                | -2.415175 | -0.338393 |
| 12            | 1             | 0           | 5.345225                | -1.327370 | -0.850971 |
| 13            | 1             | 0           | 1.703860                | -0.356714 | 1.535455  |
| 14            | 6             | 0           | -0.121965               | 0.197471  | 0.485349  |

|    |    |   |           |           |           |
|----|----|---|-----------|-----------|-----------|
| 15 | 6  | 0 | -0.840891 | 1.241316  | -0.110961 |
| 16 | 6  | 0 | -0.789647 | -0.986028 | 0.823970  |
| 17 | 6  | 0 | -2.200616 | 1.104120  | -0.377323 |
| 18 | 1  | 0 | -0.320374 | 2.164013  | -0.346267 |
| 19 | 6  | 0 | -2.149367 | -1.138655 | 0.563178  |
| 20 | 1  | 0 | -0.242274 | -1.797456 | 1.298900  |
| 21 | 6  | 0 | -2.842785 | -0.088794 | -0.040253 |
| 22 | 1  | 0 | -2.762099 | 1.912005  | -0.834615 |
| 23 | 1  | 0 | -2.668536 | -2.054097 | 0.826009  |
| 24 | 17 | 0 | -4.559405 | -0.269545 | -0.372948 |

-----  
**1d + acetone**  
-----

| Center Number | Atomic Number | Atomic Type | Coordinates (Angstroms) |           |           |
|---------------|---------------|-------------|-------------------------|-----------|-----------|
|               |               |             | X                       | Y         | Z         |
| 1             | 1             | 0           | 1.511177                | 0.151376  | -1.507057 |
| 2             | 8             | 0           | 3.754037                | 0.884603  | -0.341381 |
| 3             | 8             | 0           | 1.709921                | 1.544316  | 0.739407  |
| 4             | 6             | 0           | 3.344423                | -0.333273 | -0.528185 |
| 5             | 6             | 0           | 2.001070                | -0.566783 | -0.859389 |
| 6             | 1             | 0           | 1.660064                | -1.592769 | -0.962823 |
| 7             | 6             | 0           | 1.192601                | 0.367354  | 0.786646  |
| 8             | 1             | 0           | 2.884172                | 1.413584  | 0.113689  |
| 9             | 6             | 0           | 4.327200                | -1.423672 | -0.209735 |
| 10            | 1             | 0           | 4.715844                | -1.295917 | 0.807317  |
| 11            | 1             | 0           | 3.889274                | -2.418367 | -0.319883 |
| 12            | 1             | 0           | 5.184404                | -1.341025 | -0.888897 |
| 13            | 1             | 0           | 1.558732                | -0.343016 | 1.548093  |
| 14            | 6             | 0           | -0.263390               | 0.194064  | 0.481044  |
| 15            | 6             | 0           | -0.980406               | 1.237048  | -0.120511 |
| 16            | 6             | 0           | -0.926884               | -0.991460 | 0.824508  |
| 17            | 6             | 0           | -2.336128               | 1.094356  | -0.389373 |
| 18            | 1             | 0           | -0.457694               | 2.158453  | -0.354761 |
| 19            | 6             | 0           | -2.282571               | -1.146070 | 0.560451  |
| 20            | 1             | 0           | -0.376420               | -1.797182 | 1.304838  |
| 21            | 6             | 0           | -2.995926               | -0.101393 | -0.053020 |
| 22            | 1             | 0           | -2.895058               | 1.901396  | -0.852252 |
| 23            | 1             | 0           | -2.797505               | -2.063491 | 0.826636  |
| 24            | 6             | 0           | -4.394438               | -0.254004 | -0.328728 |
| 25            | 7             | 0           | -5.528852               | -0.380198 | -0.554480 |

-----  
**1e + acetone**  
-----

| Center Number | Atomic Number | Atomic Type | Coordinates (Angstroms) |           |           |
|---------------|---------------|-------------|-------------------------|-----------|-----------|
|               |               |             | X                       | Y         | Z         |
| 1             | 1             | 0           | -1.897708               | -0.266125 | -1.482663 |
| 2             | 8             | 0           | -4.166892               | -0.888162 | -0.302720 |
| 3             | 8             | 0           | -2.145003               | -1.490248 | 0.856478  |
| 4             | 6             | 0           | -3.739136               | 0.308439  | -0.570356 |
| 5             | 6             | 0           | -2.387379               | 0.501998  | -0.894738 |
| 6             | 1             | 0           | -2.033238               | 1.514146  | -1.067406 |
| 7             | 6             | 0           | -1.617843               | -0.318098 | 0.824756  |
| 8             | 1             | 0           | -3.314886               | -1.394317 | 0.197436  |
| 9             | 6             | 0           | -4.714078               | 1.428930  | -0.349204 |
| 10            | 1             | 0           | -5.113249               | 1.385219  | 0.670898  |
| 11            | 1             | 0           | -4.265373               | 2.407740  | -0.532842 |
| 12            | 1             | 0           | -5.565706               | 1.300111  | -1.028098 |
| 13            | 1             | 0           | -1.985759               | 0.449061  | 1.528204  |
| 14            | 6             | 0           | -0.155300               | -0.179725 | 0.526358  |
| 15            | 6             | 0           | 0.559284                | -1.273776 | 0.018583  |
| 16            | 6             | 0           | 0.513109                | 1.025252  | 0.785862  |
| 17            | 6             | 0           | 1.920605                | -1.164998 | -0.242680 |
| 18            | 1             | 0           | 0.031328                | -2.206364 | -0.149408 |
| 19            | 6             | 0           | 1.874058                | 1.149959  | 0.529752  |
| 20            | 1             | 0           | -0.036864               | 1.870094  | 1.193624  |
| 21            | 6             | 0           | 2.557918                | 0.049105  | 0.014268  |
| 22            | 1             | 0           | 2.494991                | -1.996284 | -0.632705 |

|    |   |   |          |           |           |
|----|---|---|----------|-----------|-----------|
| 23 | 1 | 0 | 2.411244 | 2.070352  | 0.722132  |
| 24 | 7 | 0 | 3.997799 | 0.171984  | -0.260058 |
| 25 | 8 | 0 | 4.534547 | 1.254675  | -0.023952 |
| 26 | 8 | 0 | 4.580248 | -0.813771 | -0.711603 |

-----  
**1b + methylamine-acetone enamine**  
-----

| Center<br>Number | Atomic<br>Number | Atomic<br>Type | Coordinates (Angstroms) |           |           |
|------------------|------------------|----------------|-------------------------|-----------|-----------|
|                  |                  |                | X                       | Y         | Z         |
| 1                | 1                | 0              | 0.491693                | 0.065892  | -1.485498 |
| 2                | 8                | 0              | 0.624383                | -1.360195 | 0.801676  |
| 3                | 6                | 0              | 2.293750                | 0.582225  | -0.471756 |
| 4                | 6                | 0              | 0.892568                | 0.715987  | -0.711949 |
| 5                | 1                | 0              | 0.519571                | 1.735049  | -0.790563 |
| 6                | 6                | 0              | 0.098432                | -0.177633 | 0.726877  |
| 7                | 1                | 0              | 0.331926                | 0.534831  | 1.548700  |
| 8                | 7                | 0              | 2.746614                | -0.664193 | -0.380597 |
| 9                | 1                | 0              | 1.934974                | -1.297866 | -0.060291 |
| 10               | 6                | 0              | 4.074723                | -1.006201 | 0.111116  |
| 11               | 1                | 0              | 4.195698                | -0.779768 | 1.179140  |
| 12               | 1                | 0              | 4.842313                | -0.465580 | -0.450302 |
| 13               | 1                | 0              | 4.232609                | -2.077064 | -0.034298 |
| 14               | 6                | 0              | 3.178955                | 1.752848  | -0.146345 |
| 15               | 1                | 0              | 3.601953                | 1.667626  | 0.863239  |
| 16               | 1                | 0              | 4.024739                | 1.807620  | -0.843735 |
| 17               | 1                | 0              | 2.622979                | 2.689624  | -0.217191 |
| 18               | 6                | 0              | -1.368777               | -0.070398 | 0.347186  |
| 19               | 6                | 0              | -2.097596               | 1.099133  | 0.591202  |
| 20               | 6                | 0              | -2.013292               | -1.165289 | -0.238126 |
| 21               | 6                | 0              | -3.446416               | 1.180815  | 0.243673  |
| 22               | 1                | 0              | -1.605690               | 1.948403  | 1.063404  |
| 23               | 6                | 0              | -3.361210               | -1.086028 | -0.587398 |
| 24               | 1                | 0              | -1.439011               | -2.074026 | -0.389958 |
| 25               | 6                | 0              | -4.081704               | 0.087725  | -0.350616 |
| 26               | 1                | 0              | -4.003312               | 2.093642  | 0.441160  |
| 27               | 1                | 0              | -3.854927               | -1.944166 | -1.037389 |
| 28               | 1                | 0              | -5.133460               | 0.147583  | -0.618846 |

-----  
**1c + methylamine-acetone enamine**  
-----

| Center<br>Number | Atomic<br>Number | Atomic<br>Type | Coordinates (Angstroms) |           |           |
|------------------|------------------|----------------|-------------------------|-----------|-----------|
|                  |                  |                | X                       | Y         | Z         |
| 1                | 1                | 0              | 1.241725                | 0.099068  | -1.436291 |
| 2                | 8                | 0              | 1.514275                | -1.381212 | 0.808286  |
| 3                | 6                | 0              | 3.092530                | 0.611386  | -0.514094 |
| 4                | 6                | 0              | 1.678665                | 0.735023  | -0.670557 |
| 5                | 1                | 0              | 1.293680                | 1.752070  | -0.704720 |
| 6                | 6                | 0              | 0.974329                | -0.205038 | 0.791022  |
| 7                | 1                | 0              | 1.242647                | 0.493024  | 1.614371  |
| 8                | 7                | 0              | 3.564892                | -0.630416 | -0.482332 |
| 9                | 1                | 0              | 2.786134                | -1.287515 | -0.149859 |
| 10               | 6                | 0              | 4.922722                | -0.972591 | -0.079477 |
| 11               | 1                | 0              | 5.099469                | -0.785043 | 0.988149  |
| 12               | 1                | 0              | 5.650614                | -0.400230 | -0.661452 |
| 13               | 1                | 0              | 5.084386                | -2.034816 | -0.274799 |
| 14               | 6                | 0              | 3.984226                | 1.783551  | -0.214358 |
| 15               | 1                | 0              | 4.471731                | 1.677296  | 0.763552  |
| 16               | 1                | 0              | 4.782905                | 1.866042  | -0.962675 |
| 17               | 1                | 0              | 3.415388                | 2.715093  | -0.225212 |
| 18               | 6                | 0              | -0.512271               | -0.109547 | 0.492597  |
| 19               | 6                | 0              | -1.243051               | 1.048986  | 0.776776  |
| 20               | 6                | 0              | -1.176299               | -1.210453 | -0.057412 |
| 21               | 6                | 0              | -2.608911               | 1.122304  | 0.505375  |
| 22               | 1                | 0              | -0.742069               | 1.906554  | 1.222604  |
| 23               | 6                | 0              | -2.540954               | -1.156299 | -0.336563 |
| 24               | 1                | 0              | -0.602615               | -2.113247 | -0.242029 |
| 25               | 6                | 0              | -3.244603               | 0.014640  | -0.054927 |

|    |    |   |           |           |           |
|----|----|---|-----------|-----------|-----------|
| 26 | 1  | 0 | -3.175624 | 2.020457  | 0.728186  |
| 27 | 1  | 0 | -3.058122 | -2.011924 | -0.758870 |
| 28 | 17 | 0 | -4.971588 | 0.093765  | -0.401248 |

-----  
**1d + methylamine-acetone enamine**  
-----

| Center Number | Atomic Number | Atomic Type | Coordinates (Angstroms) |           |           |
|---------------|---------------|-------------|-------------------------|-----------|-----------|
|               |               |             | X                       | Y         | Z         |
| 1             | 1             | 0           | 1.089212                | 0.104253  | -1.437073 |
| 2             | 8             | 0           | 1.363149                | -1.383019 | 0.811779  |
| 3             | 6             | 0           | 2.940623                | 0.614954  | -0.515497 |
| 4             | 6             | 0           | 1.527379                | 0.740077  | -0.671933 |
| 5             | 1             | 0           | 1.143334                | 1.757422  | -0.704110 |
| 6             | 6             | 0           | 0.825431                | -0.209690 | 0.797074  |
| 7             | 1             | 0           | 1.091761                | 0.490514  | 1.618882  |
| 8             | 7             | 0           | 3.416211                | -0.625609 | -0.491160 |
| 9             | 1             | 0           | 2.646321                | -1.291823 | -0.178201 |
| 10            | 6             | 0           | 4.775885                | -0.971297 | -0.096694 |
| 11            | 1             | 0           | 4.952644                | -0.801286 | 0.973639  |
| 12            | 1             | 0           | 5.500517                | -0.386936 | -0.670295 |
| 13            | 1             | 0           | 4.939553                | -2.029527 | -0.310545 |
| 14            | 6             | 0           | 3.832744                | 1.786255  | -0.214950 |
| 15            | 1             | 0           | 4.330072                | 1.673274  | 0.757072  |
| 16            | 1             | 0           | 4.623395                | 1.876308  | -0.970851 |
| 17            | 1             | 0           | 3.261973                | 2.716604  | -0.213209 |
| 18            | 6             | 0           | -0.659656               | -0.110068 | 0.490381  |
| 19            | 6             | 0           | -1.388664               | 1.051624  | 0.774158  |
| 20            | 6             | 0           | -1.320272               | -1.213457 | -0.062348 |
| 21            | 6             | 0           | -2.749353               | 1.124068  | 0.497448  |
| 22            | 1             | 0           | -0.885403               | 1.905997  | 1.222519  |
| 23            | 6             | 0           | -2.679882               | -1.155949 | -0.346016 |
| 24            | 1             | 0           | -0.743097               | -2.114576 | -0.242429 |
| 25            | 6             | 0           | -3.404922               | 0.017272  | -0.070454 |
| 26            | 1             | 0           | -3.313191               | 2.024840  | 0.719287  |
| 27            | 1             | 0           | -3.192911               | -2.012696 | -0.772209 |
| 28            | 6             | 0           | -4.807118               | 0.084009  | -0.359494 |
| 29            | 7             | 0           | -5.945144               | 0.140608  | -0.596948 |

-----  
**1e + methylamine-acetone enamine**  
-----

| Center Number | Atomic Number | Atomic Type | Coordinates (Angstroms) |           |           |
|---------------|---------------|-------------|-------------------------|-----------|-----------|
|               |               |             | X                       | Y         | Z         |
| 1             | 1             | 0           | 1.502944                | -0.008600 | -1.436830 |
| 2             | 8             | 0           | 1.811744                | -1.326461 | 0.897775  |
| 3             | 6             | 0           | 3.359316                | 0.578900  | -0.570568 |
| 4             | 6             | 0           | 1.943185                | 0.681805  | -0.721825 |
| 5             | 1             | 0           | 1.548422                | 1.690852  | -0.820720 |
| 6             | 6             | 0           | 1.261847                | -0.156078 | 0.805643  |
| 7             | 1             | 0           | 1.537245                | 0.596480  | 1.577219  |
| 8             | 7             | 0           | 3.838478                | -0.655545 | -0.454363 |
| 9             | 1             | 0           | 3.060877                | -1.285239 | -0.052219 |
| 10            | 6             | 0           | 5.201989                | -0.955969 | -0.038179 |
| 11            | 1             | 0           | 5.389808                | -0.679193 | 1.008100  |
| 12            | 1             | 0           | 5.921205                | -0.430879 | -0.673525 |
| 13            | 1             | 0           | 5.368140                | -2.030041 | -0.145813 |
| 14            | 6             | 0           | 4.244056                | 1.775527  | -0.358069 |
| 15            | 1             | 0           | 4.734628                | 1.742578  | 0.623615  |
| 16            | 1             | 0           | 5.040548                | 1.810200  | -1.112458 |
| 17            | 1             | 0           | 3.668669                | 2.700166  | -0.433246 |
| 18            | 6             | 0           | -0.228975               | -0.086985 | 0.520967  |
| 19            | 6             | 0           | -0.959845               | 1.082127  | 0.760822  |
| 20            | 6             | 0           | -0.892165               | -1.216483 | 0.029856  |
| 21            | 6             | 0           | -2.329983               | 1.128834  | 0.501392  |
| 22            | 1             | 0           | -0.452226               | 1.958960  | 1.160435  |
| 23            | 6             | 0           | -2.261478               | -1.172261 | -0.231264 |
| 24            | 1             | 0           | -0.313798               | -2.123052 | -0.119403 |
| 25            | 6             | 0           | -2.984595               | 0.000854  | 0.000633  |



|    |   |   |           |           |           |
|----|---|---|-----------|-----------|-----------|
| 26 | 1 | 0 | -2.888041 | 2.041824  | 0.694806  |
| 27 | 1 | 0 | -2.769276 | -2.056961 | -0.608220 |
| 28 | 7 | 0 | -4.428984 | 0.045095  | -0.268969 |
| 29 | 8 | 0 | -5.017387 | 1.068718  | -0.058262 |
| 30 | 8 | 0 | -4.961321 | -0.944202 | -0.688869 |

---
